# Supplementary material for: Neuroglobin is capable of self-oxidation of methionine64 introduced at the heme axial position
Source: Royal Society of Chemistry journal article supplement (doi:10.1039/c8dt02397b), 2018-01-01
Supplement: c8dt02397b1.pdf [file c8dt02397b1.pdf]

# Neuroglobin is capable of self-oxidation of methionine64 introduced at the heme axial position

Hai-Xiao Liu,<sup>a</sup> Lianzhi Li,<sup>b</sup> Bo He,<sup>a</sup> Shu-Qin Gao,<sup>c</sup> Ge-Bo Wen,<sup>c</sup> and Ying-Wu Lin<sup>\*a,c</sup>

<sup>a)</sup> *School of Chemistry and Chemical Engineering, University of South China, Hengyang 421001, China; E-mail: linlinying@hotmail.com*

<sup>b)</sup> *School of Chemistry and Chemical Engineering, Liaocheng University, Liaocheng 252059, China.*

<sup>c)</sup> *Laboratory of Protein Structure and Function, University of South China, Hengyang 421001, China.*

## Supporting Information

### Contents

#### 1. Experimental Section

- |                                                                                                                                                                                |        |
|--------------------------------------------------------------------------------------------------------------------------------------------------------------------------------|--------|
| 1.1 Protein preparation                                                                                                                                                        | p. S2  |
| 1.2 UV-Vis and stopped-flow studies                                                                                                                                            | p. S2  |
| 1.3 EPR spectroscopy                                                                                                                                                           | p. S3  |
| 1.4 ESI-MS mass spectrometry                                                                                                                                                   | p. S3  |
| 2. <b>Fig. S1.</b> ESI-MS spectra of H64M Ngb.                                                                                                                                 | p. S4  |
| 3. <b>Fig. S2.</b> ESI-MS spectra of H64M/C120S Ngb.                                                                                                                           | p. S5  |
| 4. <b>Fig. S3.</b> ESI-MS spectra of trypsin-digested H64M/C120S Ngb.                                                                                                          | p. S6  |
| 5. <b>Fig. S4.</b> Amino acid sequence and ESI-MS spectrum of trypsin-digested H64M Ngb with DTT.                                                                              | p. S7  |
| 6. <b>Fig. S5.</b> ESI-MS spectra of H64M/C120S Ngb with DTT for 5 h.                                                                                                          | p. S8  |
| 7. <b>Fig. S6</b> ESI-MS spectra of H64M/C120S Ngb after incubation with DTT.                                                                                                  | p. S9  |
| 8. <b>Fig. S7</b> UV-Vis spectral changes of H64M/C120S Ngb in presence of DTT.                                                                                                | p. S10 |
| 9. <b>Fig. S8</b> EPR study of H64M/C120S Ngb in reaction with H <sub>2</sub> O <sub>2</sub> .                                                                                 | p. S10 |
| 10. <b>Fig. S9</b> ESI-MS spectra of H64M/C120S Ngb and after addition of H <sub>2</sub> O <sub>2</sub> , K <sub>3</sub> [Fe(CN) <sub>6</sub> ], or <i>m</i> -CPBA for 10 min. | p. S11 |
| 11. <b>Fig. S10</b> Original multiply-charged series in ESI-MS spectra of H64M/C120S Ngb addition of H <sub>2</sub> O <sub>2</sub> or <i>m</i> -CPBA for 10 min.               | p. S12 |
| 12. <b>Fig. S11</b> Stopped-flow UV-Vis spectra of H64M/C120S Ngb in reaction with H <sub>2</sub> O <sub>2</sub> for 0.5 sec.                                                  | p. S13 |

## 1. Experimental Section

### 1.1 Protein preparation

The pET3a plasmid DNA containing the gene of wild-type (WT) human Ngb was a gift from Prof. T. Burmester, Gutenberg University of Mainz, Germany. The H64M Ngb and H64M/C120S Ngb genes were constructed using the QuikChange Site Directed Mutagenesis Kit (Stratagene) with two primers: H64M, forward, 5'-GAG TTC CTG GAC ATG ATC AGG AAG GTG-3', and reverse, 5'-CAC CTT CCT GAT CAT GTC CAG GAA CTC-3'; C120S, 5'- ATG CTG GAG AAG TCT CTG GGC CCT GCC-3', and reverse, 5'-GGC AGG GCC CAG AGA CTT CTC CAG CAT-3'. The mutations were confirmed by DNA sequencing assay. Both mutants were expressed in BL21(DE3) and purified using a similar procedure for WT Ngb.<sup>1</sup> After eluted from DEAE column with 200 mM NaCl, the protein was concentrated by Amicon filtration (PM10) and oxidized with  $K_3[Fe(CN)_6]$ . It was then passed through a Sephacryl S-100 column, followed by further purification using a Mono Q column and eluted with a linear gradient of 1 M NaCl.

### 1.2 UV-Vis and stopped-flow studies

UV-Vis spectrum of ferric Ngbs were recorded in 100 mM potassium phosphate buffer (pH 7.0) on a Agilent 8453 diode array spectrometer. The ferrous protein samples were obtained by addition of a small amount of sodium dithionite. The protein concentration was determined with an extinction coefficient of  $\epsilon_{405} = 160 \pm 5 \text{ mM}^{-1} \text{ cm}^{-1}$  for both H64M Ngb and H64M/C120S Ngb mutants, as calculated using the standard hemochromagen method.<sup>2</sup> In another study, after addition of DTT to a final concentration of 0.5 mM, the spectral changes of H64M/C120S Ngb (10  $\mu\text{M}$ ) were collected at different time courses at 25 °C.

Kinetic UV-Vis studies of H64M/C120S Ngb in reaction with dithiothreitol (DTT), *m*-chloroperbenzoic acid (*m*-CPBA) or  $H_2O_2$ , were performed with a SF-61DX2 Hi-Tech KinetAsyst<sup>TM</sup> dual mixing stopped-flow spectrophotometer. Typically, one syringe contains 20  $\mu\text{M}$  protein (100 mM potassium phosphate buffer, pH 7.0), and the second syringe contains 1 mM DTT, 0.2 mM *m*-CPBA or  $H_2O_2$ . The reaction was started with mixing of equal volume of solutions from the both syringes. 500 (or 50) time-dependent spectra were collected over 30 s (or 0.5 s) from 350 to 700 nm at 25 °C.

### 1.3 EPR studies

Electron Paramagnetic Resonance (EPR) spectra of WT and H64M Ngb (0.3 mM) in 100 mM potassium phosphate buffer (pH 7.0), containing 10% glycerol, were collected at the high magnetic field laboratory of Chinese Academy of Science (Hefei, China). The samples were analyzed by X-band EPR on a Bruker EMX plus 10/12 spectrometer. A standard Bruker cavity (ER4119hs TE011) was used in conjunction with an Oxford Instrument EPR910 liquid helium continuous-flow cryostat for low-temperature analysis. The spectra were measured at 10 K, with frequency of 9.43 GHz, center field 2200 G and sweep width 3600 G, microwave power 2 mW and modulation amplitude 2.0 G. The EPR spectra H64M/C120S Ngb (0.5 mM) and in reaction with DTT (50 mM) for 15, 30, 45 min, 1, 2 and 12 h, or in reaction with H<sub>2</sub>O<sub>2</sub> (0.5 mM) for 30 s, 1, 5 and 10 min, were recorded on a Bruker A300 spectrometer (X-band), equipped with Bruker ER4141VTM liquid nitrogen system, as available in the authors' lab. The spectra were measured at 100 K, with frequency of 9.43 GHz, center field 2200 G and sweep width 3600 G, microwave power 2.0 mW and modulation amplitude 3.0 G.

### 1.4 Mass spectrometry

Protein mass spectrum measurement was carried out on G2-XS QToF mass spectrometer (Waters). The desalted protein solution (~20 μM) was mixed with 1% formic acid and transferred into the mass spectrometer chamber for measurement under positive mode. The multiple m/z peaks were transformed to the protein molecular weight by using software MaxEnt1. For trypsin digestion studies, 50 μL H64M Ngb and H64M/C120S Ngb (~0.1 mM) in ammonium carbonate buffer (50 mM, pH 7.8) was mixed with the same volume of trypsin solution (1 mg/mL) in the same buffer, and the mixture was heated at 37 °C for 12 h, followed by addition of DTT (10 mM) and treatment at 37 °C for 3 h, before determining the MS of the digested protein fragments. The mass spectra of the protein after reaction with 10 eq. *m*-CPBA, H<sub>2</sub>O<sub>2</sub> or K<sub>3</sub>[Fe(CN)<sub>6</sub>] for 10 min were determined used the same procedure.

### References:

1. S. Dewilde, L. Kiger, T. Burmester, et al., *J. Biol. Chem.*, 2001, 276, 38949-38955.
2. M. Morrison, S. Horie, *Anal. Biochem.*, 1965, 12, 77-82.

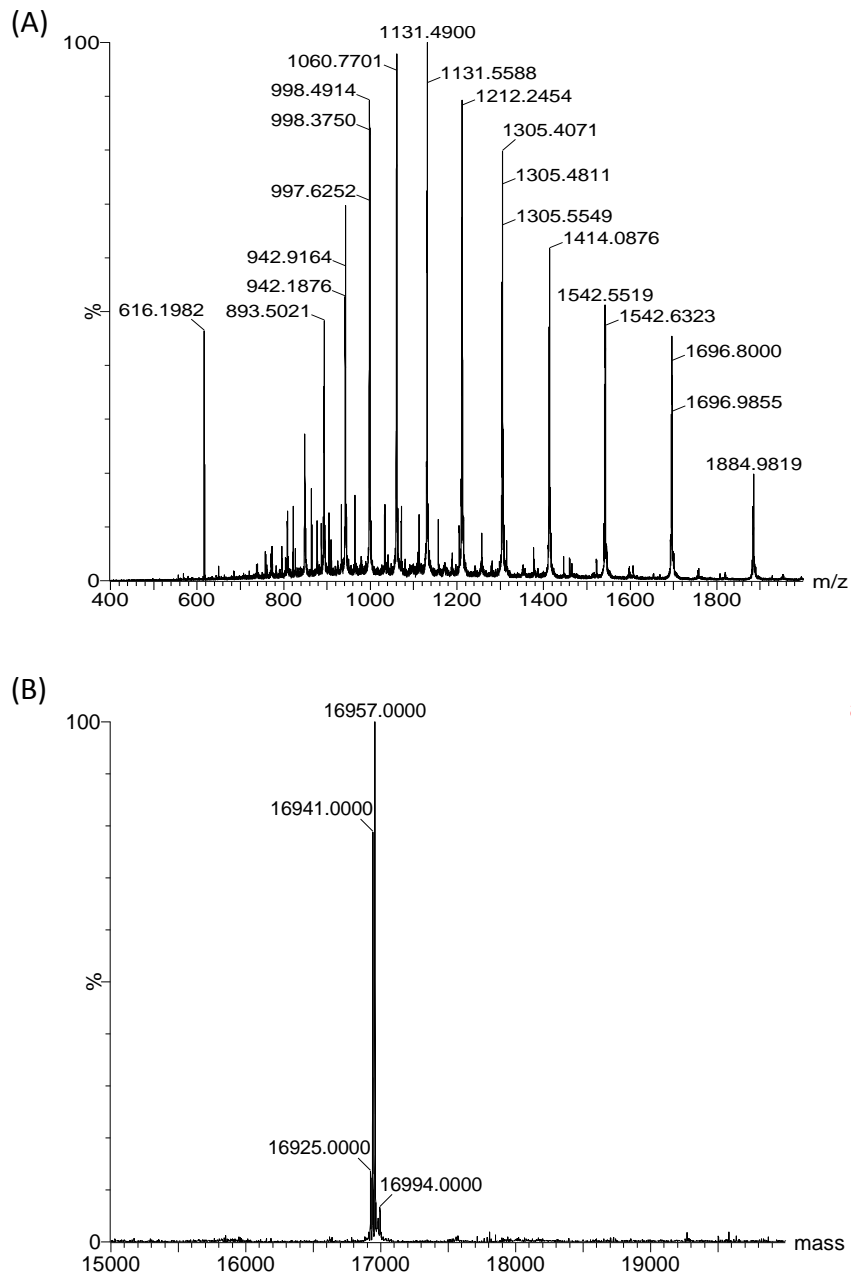

**Fig. S1** ESI-MS spectra of H64M Ngb as purified. (A) Original multiply-charged series. (B) The MaxEnt survey spectrum showing the major components. Note that the calculated mass of H64M Ngb with an intramolecular disulfide bond of Cys46-Cys55 is 16925.5 Da.

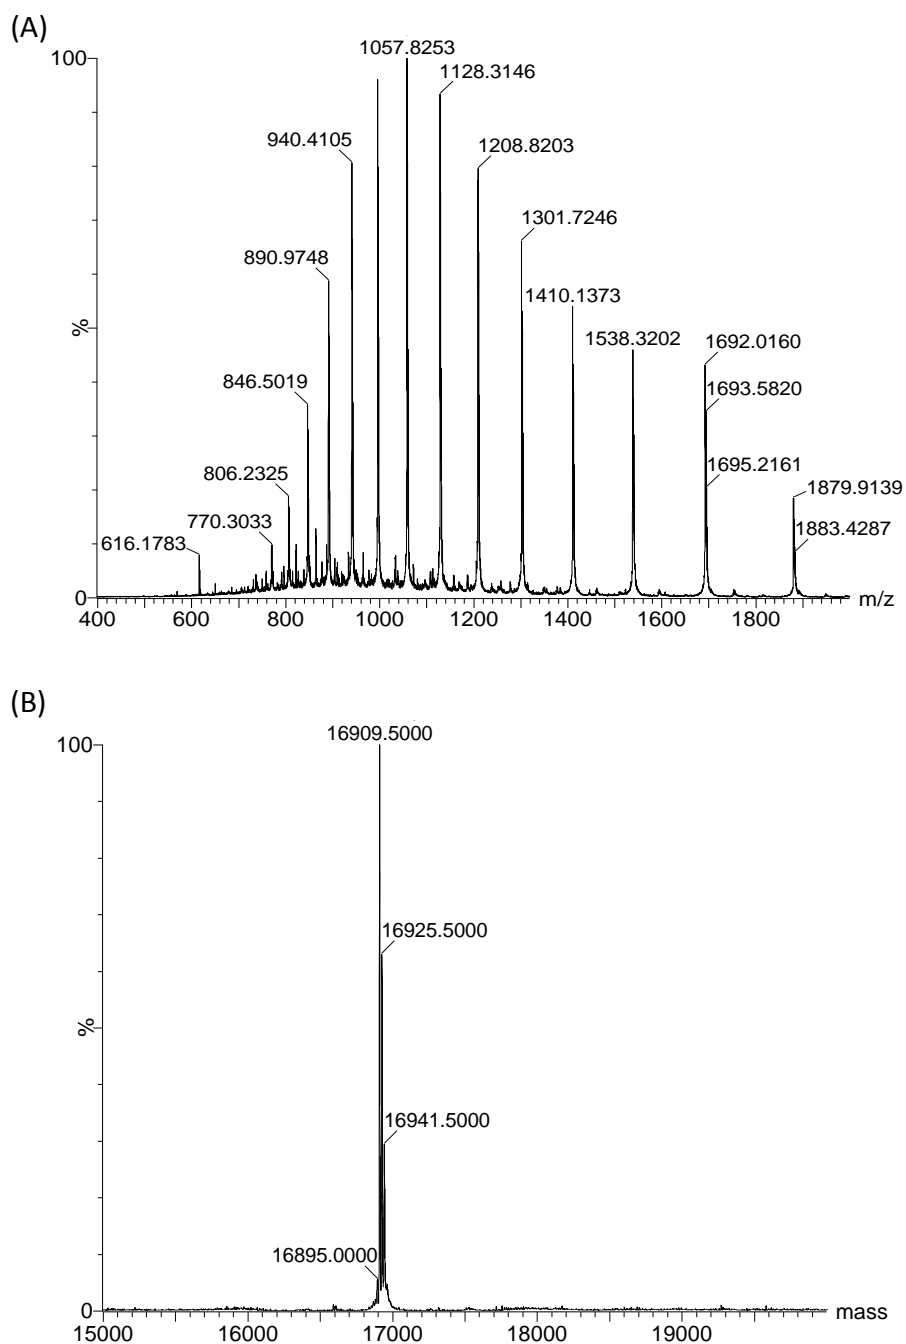

**Fig. S2** ESI-MS spectra of H64M/C120S Ngb as purified. (A) Original multiply-charged series. (B) The MaxEnt survey spectrum showing the major components. Note that the calculated mass of H64M/C120S Ngb with an intramolecular disulfide bond of Cys46-Cys55 is 16909.4 Da.

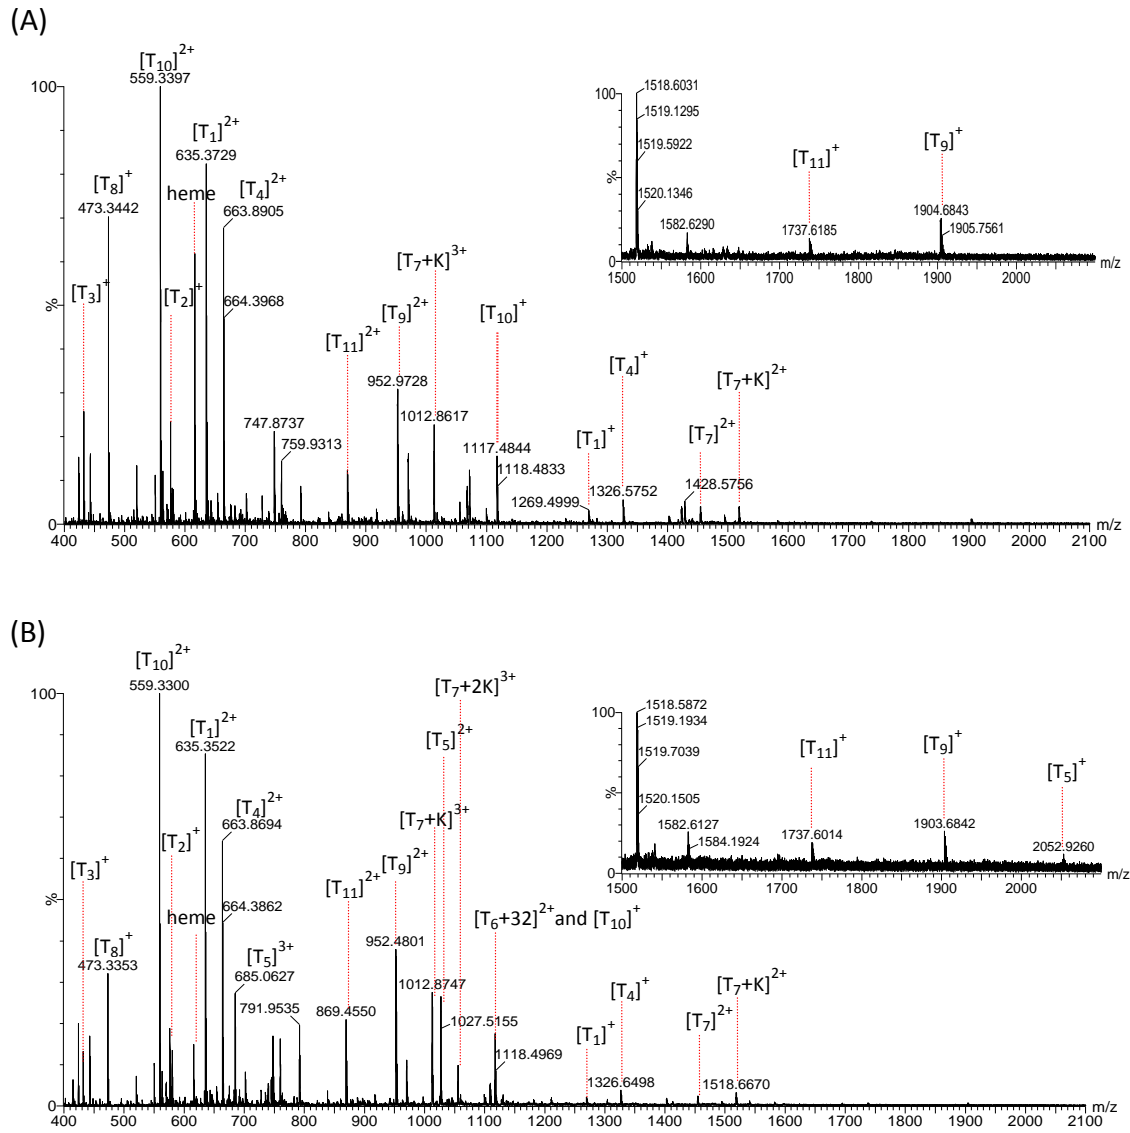

**Fig. S3** ESI-MS spectra of trypsin-digested (12 h) H64M/C120S Ngb without (A) and with (B) treated by DTT at 37 °C for 3 h. The mass spectra in the 1500–2100 m/z region are shown as insets.

(A)

MERPEPELIR | QSWR | AVSR | SPLEHGTVLFAR | LFALEPDLLPLFQYN<sup>46</sup>C<sup>R</sup> |  
T<sub>1</sub> T<sub>2</sub> T<sub>3</sub> T<sub>4</sub> T<sub>5</sub>  
1269.65 576.28 432.25 1326.71 2052.05

QFSSPED<sup>55</sup>C<sup>L</sup>SSPEFLD<sup>64</sup>M<sup>I</sup>R | K | V<sup>69</sup>M<sup>L</sup>VIDAAVTNVEDLSSLEEYLA<sup>S</sup>LGR | K | HR |  
T<sub>6</sub> T<sub>7</sub>  
2200.98 2906.49

AVGVK | LSSFSTVGESLLY<sup>116</sup>M<sup>L</sup>LEK | <sup>120</sup>C<sup>L</sup>LGPAFTPATR | AAWSQLYGAVVQA<sup>144</sup>M<sup>L</sup>SR | GW<sup>D</sup>GE  
T<sub>8</sub> T<sub>9</sub> T<sub>10</sub> T<sub>11</sub> T<sub>12</sub>  
473.30 1903.96 1133.57 1737.87 563.20

(B)

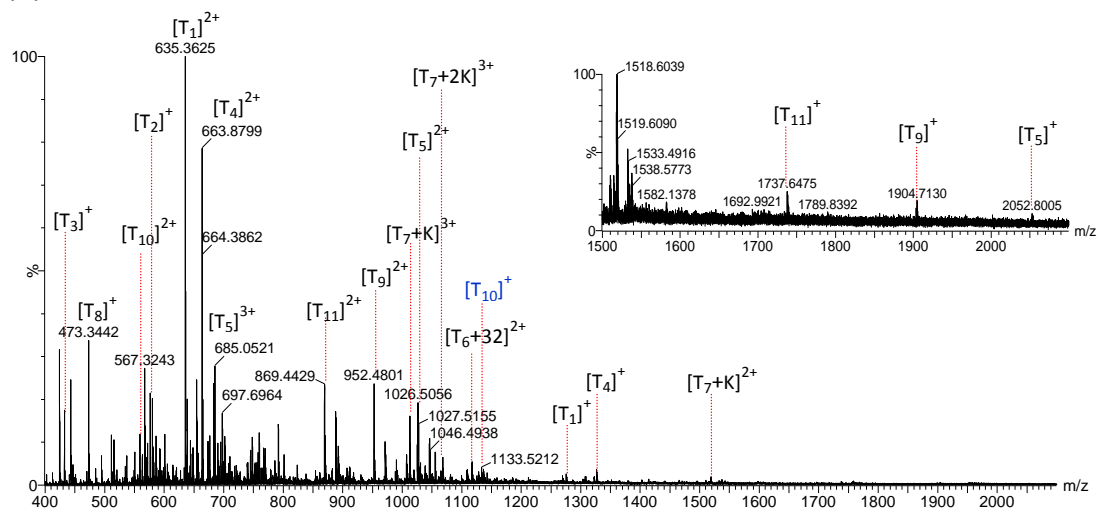

**Fig. S4** (A) Amino acid sequence of H64M Ngp and the expected peptide fragments with molecular weight larger than 400 Da obtained by trypsin digestion. (B) ESI-MS spectrum of trypsin-digested (12 h) H64M Ngp treated by DTT (10 mM) at 37 °C for 3 h. The mass spectrum in the 1500–2100 m/z region is shown as an inset.

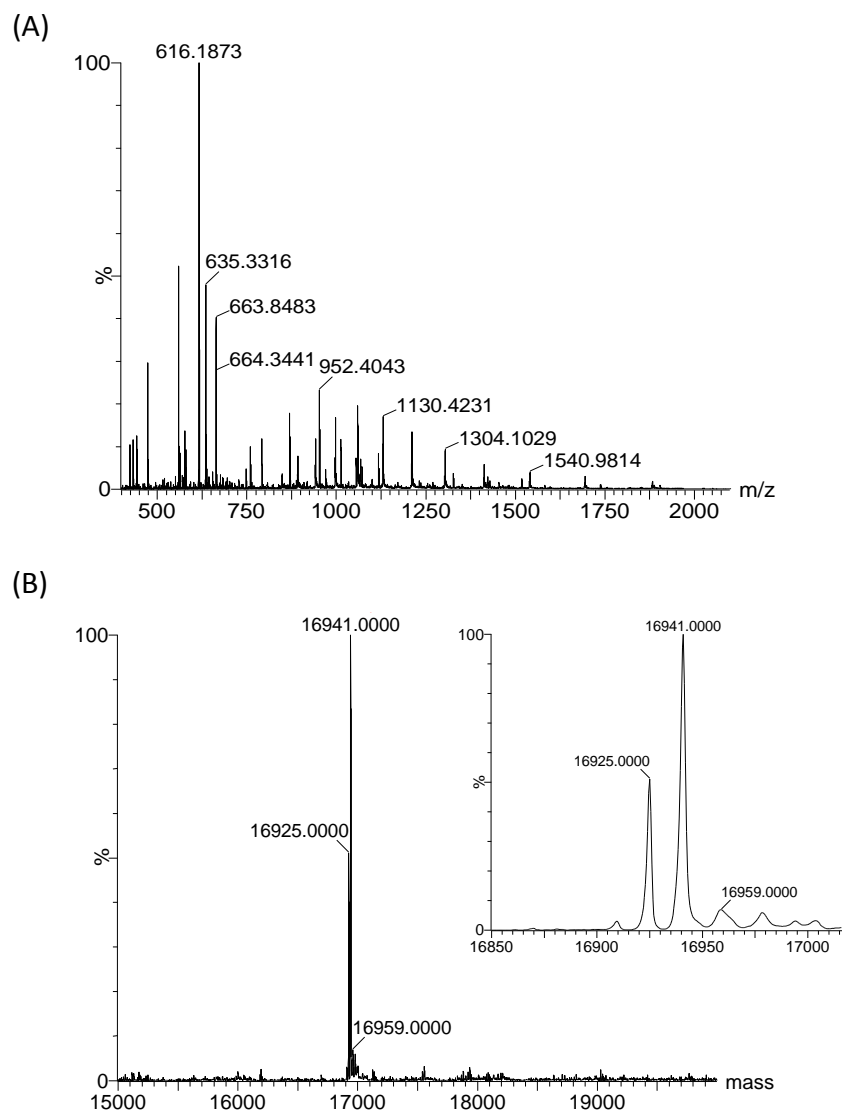

**Fig. S5** ESI-MS spectra of H64M/C120S Ngb after digestion by trypsin with DTT (10 mM) at 37 °C for 5 h before fully digested. (A) Original multiply-charged series. (B) The MaxEnt survey spectrum showing the major components. Note that the calculated mass of H64M/C120S Ngb with an intramolecular disulfide bond of Cys46-Cys55 is 16909.4 Da, which was almost converted to SO-Met (+16 Da) and SO<sub>2</sub>-Met (+32 Da) species (inset).



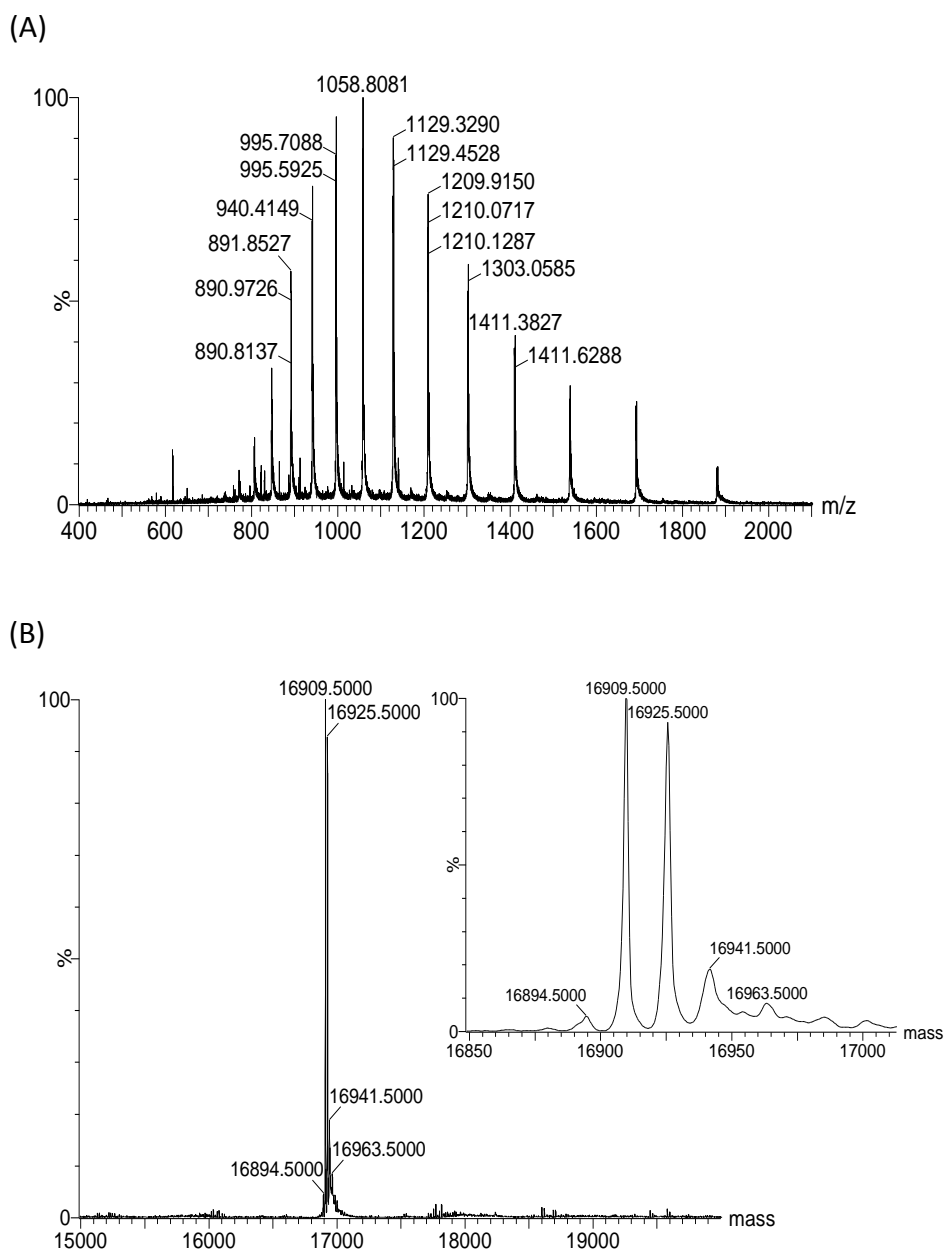

**Fig. S6** ESI-MS spectra of H64M/C120S Ngb (10  $\mu$ M) after incubation with 1 mM DTT in air for 10 min. (A) Original multiply-charged series and (B) the MaxEnt survey spectrum showing the major components.

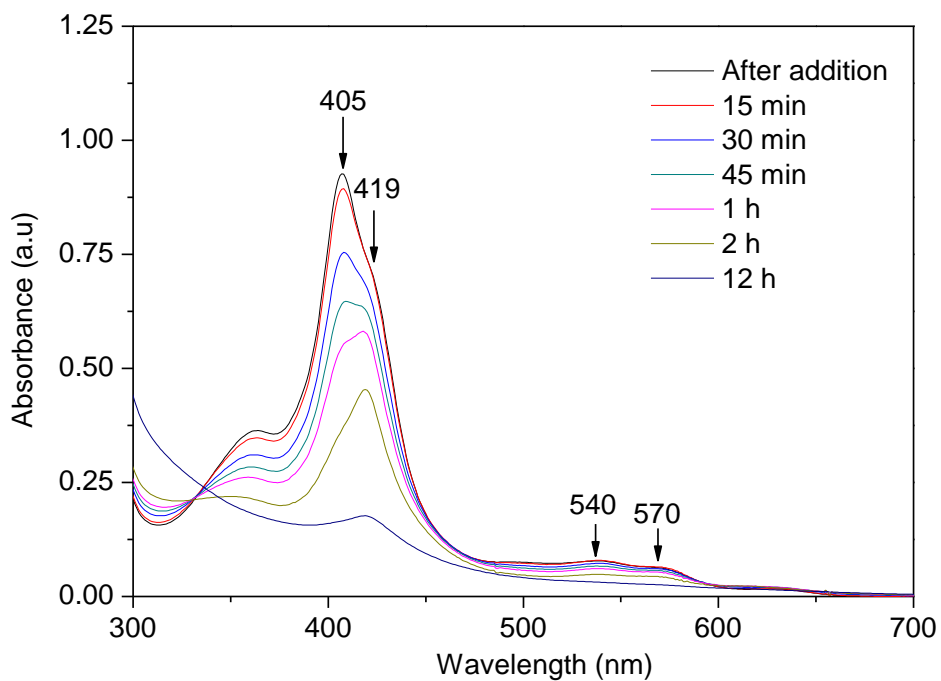

**Fig. S7** UV-Vis spectral changes of H64M/C120S Ngb (10  $\mu$ M) in presence of DTT (0.5 mM) and in 100 mM potassium phosphate buffer (pH 7.0).

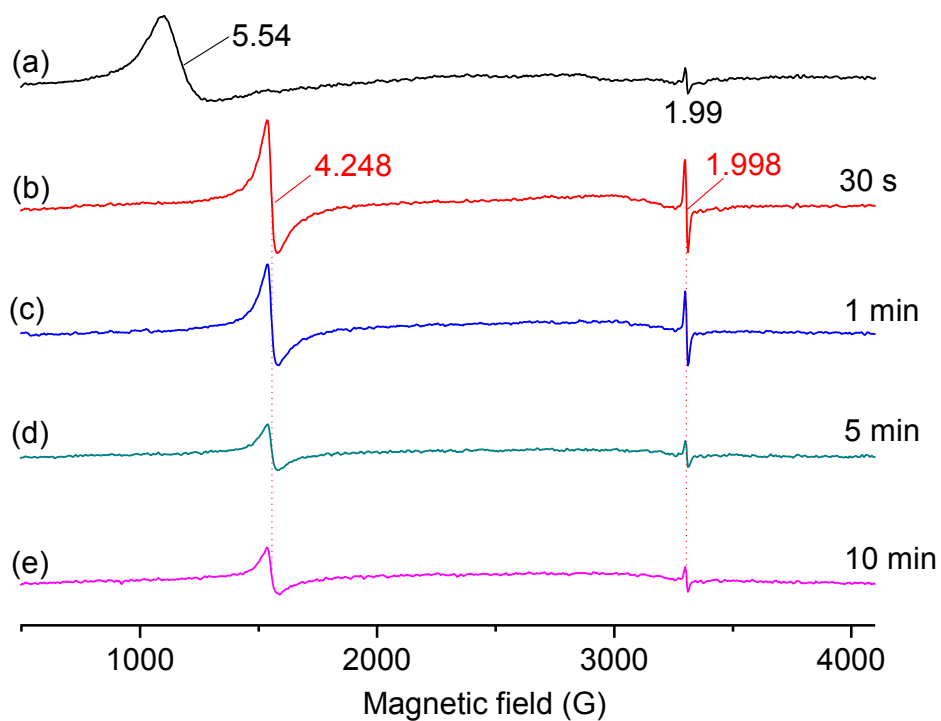

**Fig. S8** EPR spectra of ferric H64M/C120S Ngb (0.5 mM) and in reaction with  $\text{H}_2\text{O}_2$  (0.5 mM) in air for 30 sec, 1, 5 and 10 min.

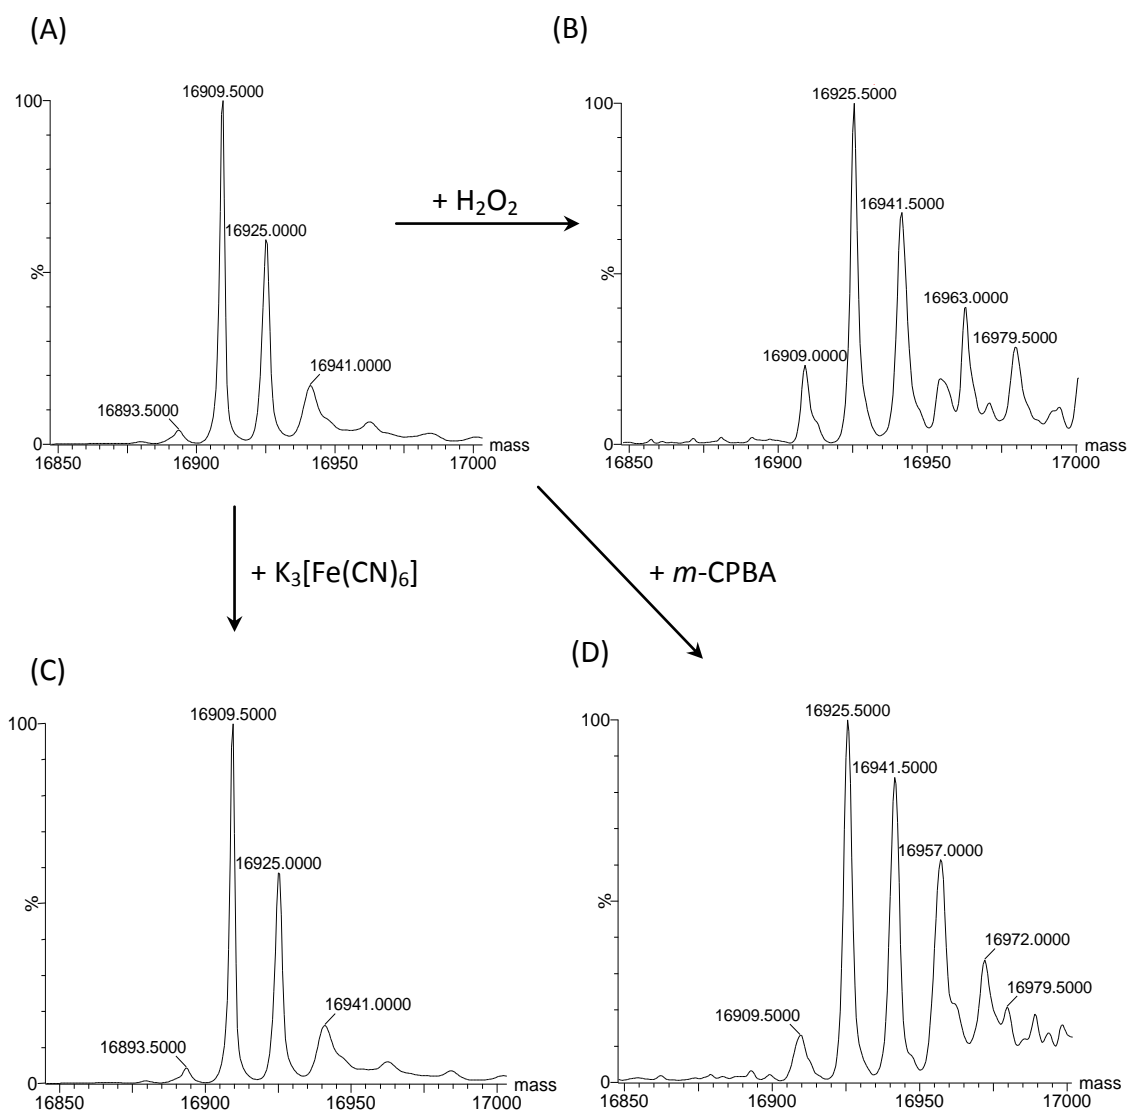

**Fig. S9** ESI-MS spectra of H64M/C120S Ngb (A) and after addition of 10 eq.  $\text{H}_2\text{O}_2$  (B),  $\text{K}_3[\text{Fe}(\text{CN})_6]$  (C), and *m*-CPBA (D), respectively, for 10 min at room temperature.

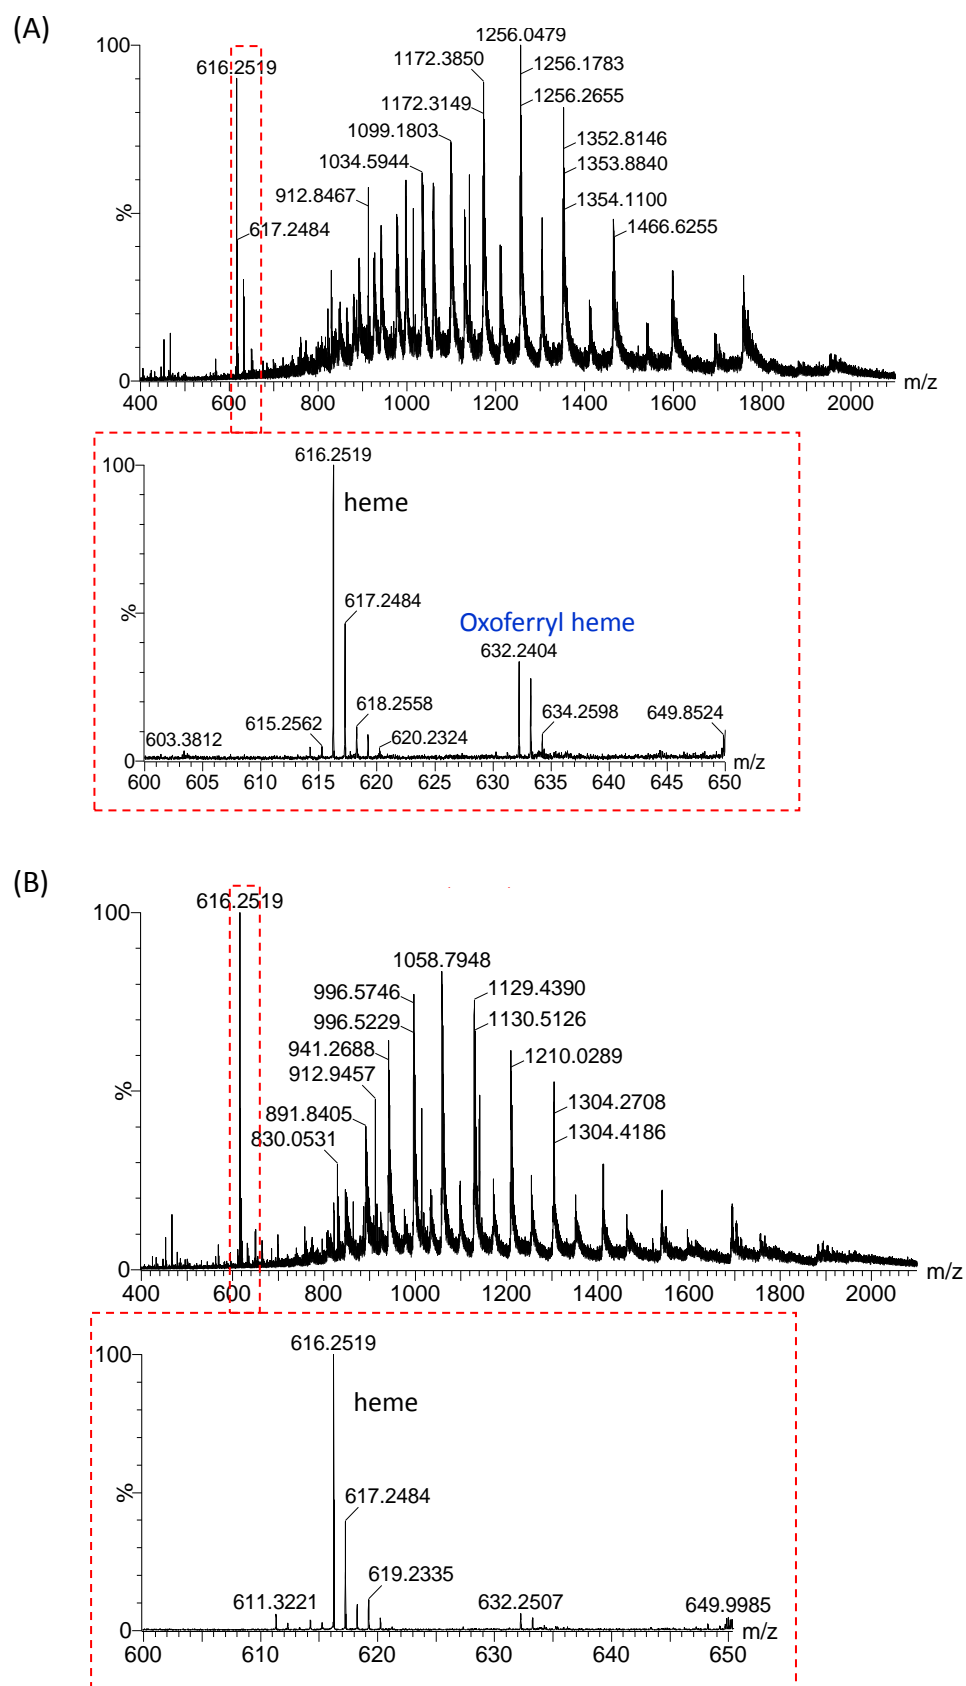

**Fig. S10** Original multiply-charged series in ESI-MS spectra of H64M/C120S Ngb after addition of *m*-CPBA (A) or H<sub>2</sub>O<sub>2</sub> (B) or for 10 min at room temperature.

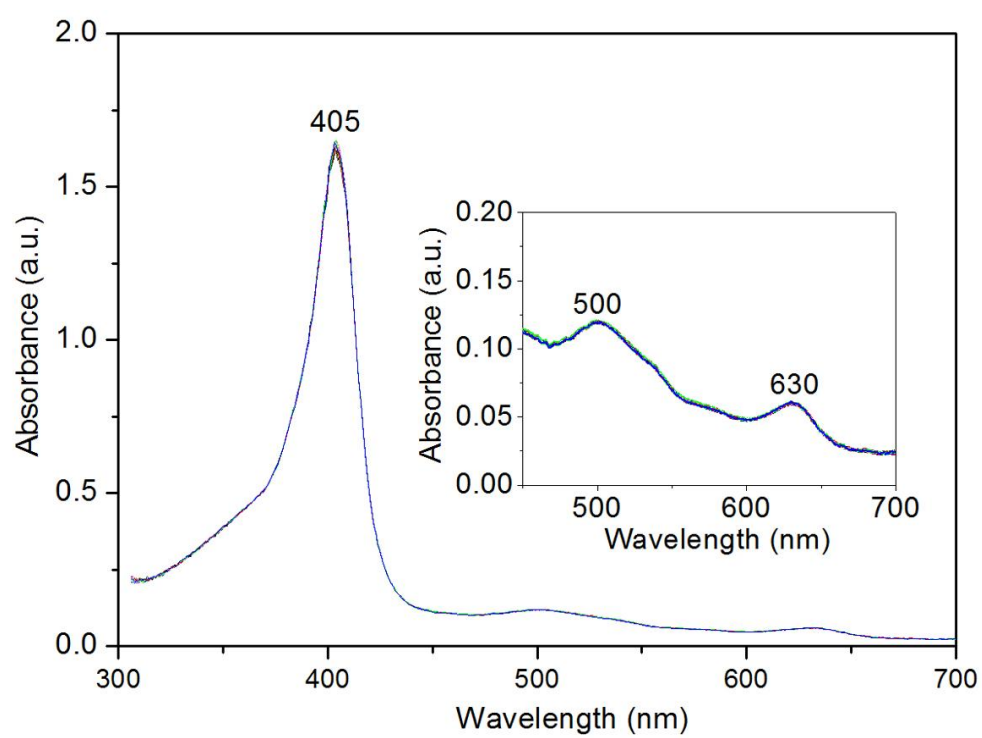

**Fig. S11** Stopped-flow UV-Vis spectra of H64M/C120S Ngb (10  $\mu$ M) in reaction with  $\text{H}_2\text{O}_2$  (0.1 mM) for 0.5 sec at 25  $^\circ\text{C}$ .
